# Supplementary material
Source: PubMed Central journal article supplement (PMC2785846)
Supplement: NIHMS158511-supplement-supp.pdf [file NIHMS158511-supplement-supp.pdf]

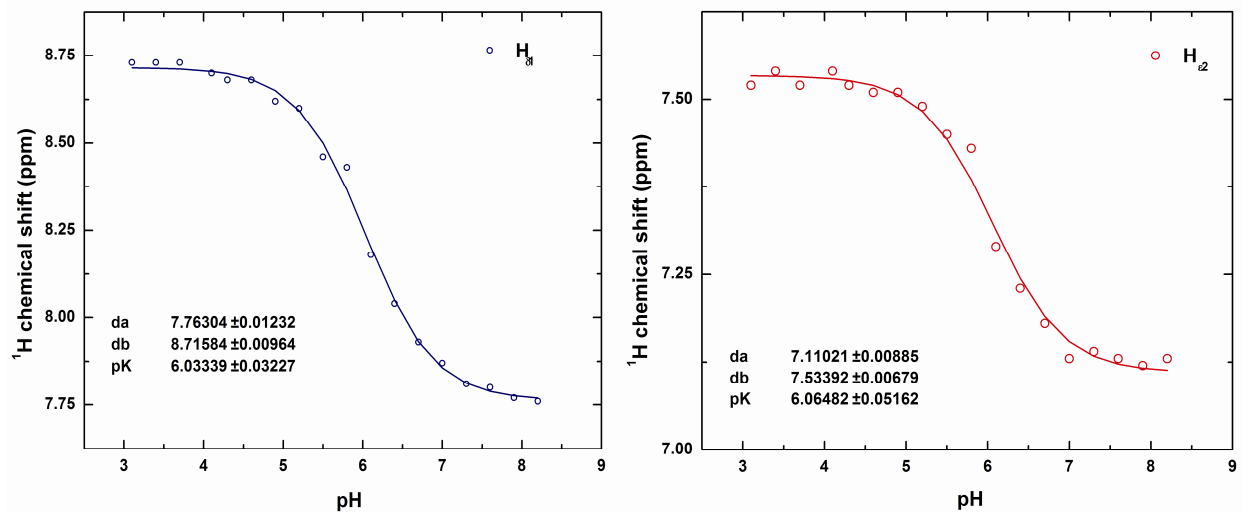

Supplemental Figure 1.  $pK_a$  estimation of His106 of yFis1 $\Delta$ TM. Given that the pI of yFis1 $\Delta$ TM is estimated to be around 7.7, we reasoned that the chemical shift changes between pH 7.4 and 5.0 might arise from the sole His residue, His106. To measure this  $pK_a$  value, we collected a series of 1D Long-range HMQC experiments at 500 MHz on a 0.5 mM sample of  $^{15}\text{N}$ -labelled yFis1 $\Delta$ TM, without buffer, 100 mM NaCl as a function of pH. The data were fit to the  $\delta = (\delta_{his-} \times 10^{-pH} + \delta_{hisH} \times 10^{-pK_a}) / (10^{-pK_a} + 10^{-pH})$  to estimate the value of  $pK_a = 6.04 \pm 0.06$  for the sole histidine in this protein, His106.

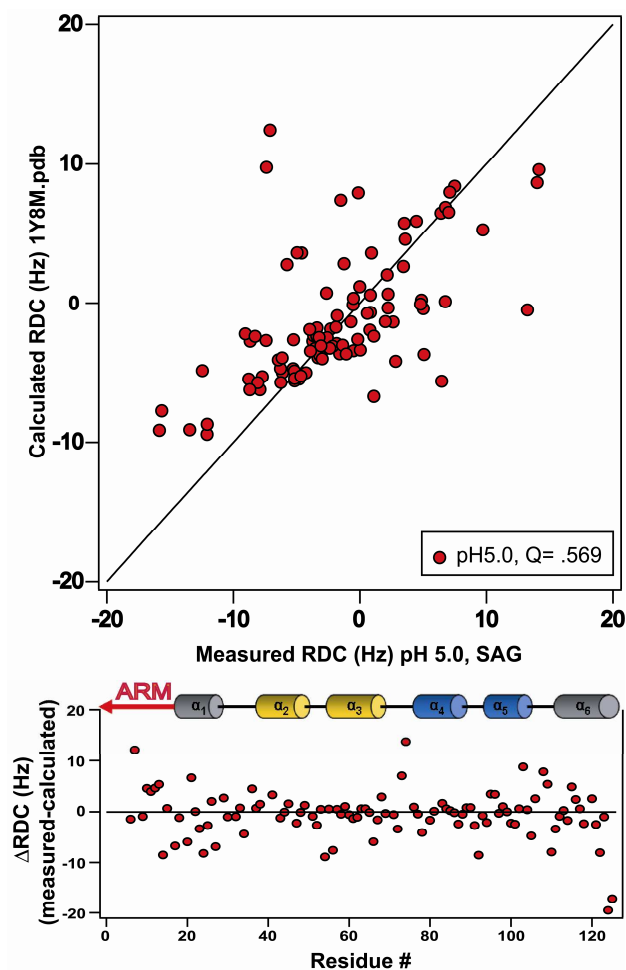

Supplemental Figure 2. Residual dipolar coupling analysis of Fis1 $\Delta$ TM at 14.2 T, 25 °C, pH 5.0

We first determined an alignment tensor using *FitAlign* for a subset of our RDC data that corresponding to those residues that showed no pH dependence to their chemical shifts and lie in the core of the structure (helices 2-5). From this alignment tensor, we used the program *euler\_pdb* to rotate the 1Y8M.pdb coordinates into this frame, and then calculated the predicted RDC values from this aligned structure using the program *calc\_rdic2*. Differences between the structure and RDC values measured at pH 5.0 appear to be smaller and more random than those seen at pH 7.4 (Fig 3). We thank Prof. Joel Tolman for providing software and guidance for this analysis.

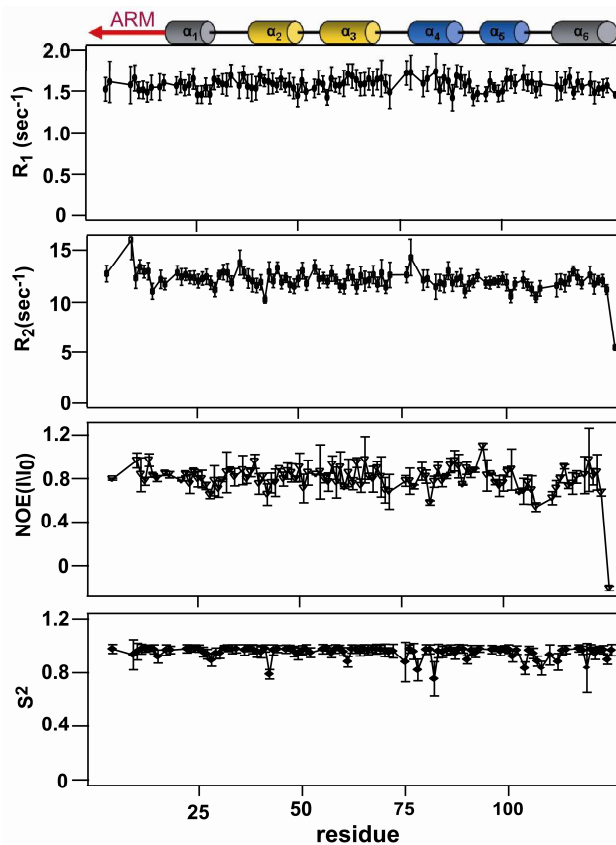

Supplemental Figure 3. NMR spin relaxation data of Fis1 $\Delta$ TM at 14.2 T, 25 °C, pH 7.4 as a function of residue number. The spin-lattice relaxation rate constant  $R_1$  (top panel), the spin-spin relaxation rate constant  $R_2$  (second panel), the steady-state heteronuclear NOE (third panel) were analyzed using the FastModelfree approach (49, 50, 59, 83) to give a squared generalized order parameter  $S^2$  (bottom panel). From this analysis the rotational correlation time of Fis1 $\Delta$ TM is  $\tau_m = 8.25 \pm 0.32$  ns.

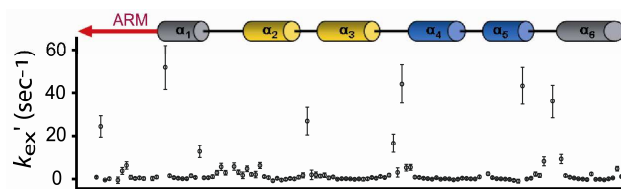

Supplemental Figure 4. NMR saturation transfer data of Fis1ΔTM at 14.2 T, 25 °C, pH 7.4 as a function of residue number. The pH-corrected rate constants for exchange of the amide backbone with solvent protons,  $k'_{ex}$ , are derived from identical experiments recorded for an <sup>15</sup>N-labeled sample of Fis1ΔTM at pH 7.4.

a)

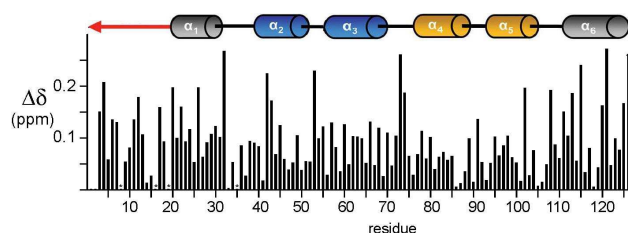

b)

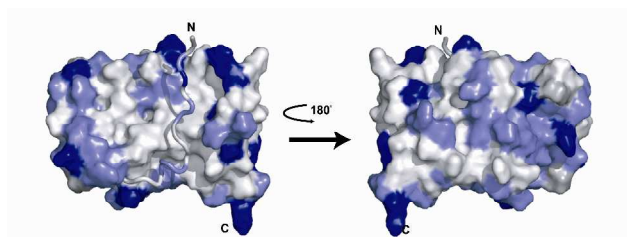

Supplemental Figure 5. NMR chemical shifts differ at 40 °C from 25 °C at pH 7.4 for a subset of residues. (a) The observed change in chemical shift,  $\Delta\delta$ , between 25 °C and 40 °C is plotted as a function of residue number where  $\Delta\delta = [({}^1\text{H}\delta_{25\text{C}} - {}^1\text{H}\delta_{40\text{C}})^2 + \{1/4 ({}^{15}\text{N}\delta_{25\text{C}} - {}^{15}\text{N}\delta_{40\text{C}})\}^2]^{1/2}$ . (b) mapping of the observed chemical shift changes onto a surface representation of the pH 5.5 structure of Fis1 $\Delta$ TM (1y8m.pdb (29)). This figure was made with the software PYMOL (81) using a color gradient (82) to display average chemical shift differences from 0 to 0.27 ppm (white to dark blue, respectively). The residues for which no chemical shift data is available are colored light gray. The chemical shift differences ranged from 0 to 0.27 ppm with an average value of  $0.094 \pm 0.063$  ppm. Only 24% of the residues displayed a temperature-induced difference greater than two standard deviations ( $> 0.125$  ppm), which can arise from conformational changes as well as differences in hydrogen bond lengths.

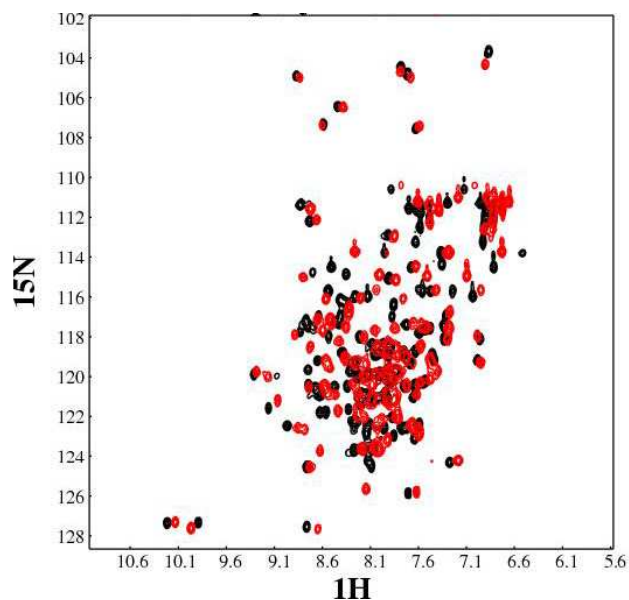

Supplemental Figure 6. I85C-Fis1 $\Delta$ TM remains well-folded at 40 °C.  $^1\text{H}$ - $^{15}\text{N}$  HSQC spectra of a 0.32 mM sample of I85C-Fis1 $\Delta$ TM at pH 7.4, 25 °C (black) and 40 °C (red). NMR experiments were performed at 14.2 T on a Bruker Avance600 spectrometer outfitted with a TXI cryoprobe at 298 K. Two-dimensional  $^1\text{H}$ - $^{15}\text{N}$  heteronuclear single quantum correlation (HSQC) experiments were collected using WATERGATE for solvent suppression (39). Uniformly  $^{15}\text{N}$ -labeled Fis1 $\Delta$ TM samples were prepared by extensive buffer exchange into buffer containing 100mM phosphate pH 7.4, 50 mM NaCl, 5 mM DTT and 10%  $^2\text{H}_2\text{O}$ . HSQC spectra were collected at 20 scans per increment, 1278 ( $t_2$ ) x 160 ( $t_1$ ) complex points with acquisition times of 64 ms ( $^1\text{H}$ ) and 48 ms ( $^{15}\text{N}$ ). The carrier frequencies were centered on the chemical shift of water in  $^1\text{H}$  and in the center of the amide region at 115.5 ppm in  $^{15}\text{N}$ . NMR data processing was carried out using NMRPipe (40) and subsequently analyzed with NMRView (41, 42).

Supplemental Table 1. RDC values of yFis1 $\Delta$ TM collected at pH 5.0 and 7.4 at 25 °C.

| res_5 | rdc 5    | stdev 5  | res_74 | rdc 74   | stdev 74 | $\Delta$ RDC | stdev $\Delta$ |
|-------|----------|----------|--------|----------|----------|--------------|----------------|
| 6     | 4.458477 | 0.762255 | 6      | -0.40486 | 0.264667 | 4.863335     | 0.806896       |
| 7     | 6.459048 | 0.581251 | 7      | 5.944305 | 2.038269 | 0.514743     | 2.119527       |
| 10    | 14.15423 | 1.593188 | 10     | 13.4166  | 5.287409 | 0.737626     | 5.522222       |
| 11    | 2.625907 | 0.30688  | 11     | 3.346429 | 1.572962 | -0.72052     | 1.602618       |
| 12    | 4.86765  | 0.569649 | 12     | 3.050659 | 1.189363 | 1.816991     | 1.318744       |
| 13    | 14.01414 | 0.928236 | 13     | 11.58219 | 1.971645 | 2.431949     | 2.179221       |
| 14    | -5.76902 | 2.376327 | 14     | -3.65255 | 2.290168 | -2.11647     | 3.300273       |
| 15    | -4.80776 | 0.565979 | 15     | -7.60573 | 0.686266 | 2.79797      | 0.889546       |
| 17    | -15.8429 | 2.728571 | 17     | -18.1477 | 1.56268  | 2.304847     | 3.14437        |
| 18    | -6.12548 | 0.36114  | 18     | -6.01307 | 0.680523 | -0.1124      | 0.770411       |
| 21    | 6.75415  | 1.127891 | 21     | 7.903476 | 1.873407 | -1.14933     | 2.186731       |
| 22    | -2.7914  | 1.509526 | 22     | -4.49284 | 3.806867 | 1.70144      | 4.09523        |
| 24    | -4.60554 | 0.230676 | 24     | -6.75296 | 0.432012 | 2.147418     | 0.489741       |
| 25    | 0.909263 | 1.250617 | 25     | 1.181406 | 0.930086 | -0.27214     | 1.558558       |
| 26    | -1.60133 | 1.368395 | 26     | -7.85388 | 1.029515 | 6.252546     | 1.712427       |
| 27    | -9.0515  | 0.882762 | 27     | -13.4495 | 1.279936 | 4.397961     | 1.554833       |
| 29    | 0.786148 | 0.46986  | 29     | -0.99564 | 0.325194 | 1.781784     | 0.571419       |
| 30    | -3.71979 | 1.909712 | 30     | -8.37802 | 1.03212  | 4.658227     | 2.170776       |
| 32    | 7.484953 | 1.183106 | 32     | 10.62687 | 1.132956 | -3.14192     | 1.638088       |
| 33    | -4.27193 | 0.202984 | 33     | -7.46652 | 2.32605  | 3.194585     | 2.33489        |
| 34    | -13.4474 | 0.476773 | 34     | -18.2014 | 0.764299 | 4.754004     | 0.900814       |
| 36    | 9.714617 | 0.40131  | 36     | 10.80716 | 0.472383 | -1.09255     | 0.619835       |
| 37    | -2.34542 | 0.635892 | 37     | -2.90049 | 0.551782 | 0.555073     | 0.841916       |
| 38    | 0.822983 | 0.79899  | 38     | 0.732426 | 0.600828 | 0.090557     | 0.99969        |
| 41    | 2.00778  | 1.104364 | 41     | 2.502481 | 0.422791 | -0.4947      | 1.182528       |
| 43    | -0.01578 | 1.531013 | 43     | 0.721928 | 1.19504  | -0.73771     | 1.942195       |
| 44    | 6.404148 | 0.690686 | 44     | 8.187683 | 0.671395 | -1.78354     | 0.963233       |
| 45    | 2.220012 | 1.872339 | 45     | 5.32827  | 1.366053 | -3.10826     | 2.317705       |
| 47    | 3.503798 | 0.784064 | 47     | -8.13991 | 1.095703 | 11.64371     | 1.347338       |
| 48    | 6.765197 | 0.520685 | 48     | 8.658724 | 0.577502 | -1.89353     | 0.777574       |
| 51    | 7.09959  | 0.635216 | 51     | 11.18053 | 1.326583 | -4.08094     | 1.470824       |
| 54    | -1.5145  | 2.901927 | 54     | 6.269439 | 1.861067 | -7.78394     | 3.447427       |
| 55    | -2.5026  | 0.440996 | 55     | -3.46252 | 0.779661 | 0.959917     | 0.895739       |
| 56    | -12.4499 | 1.764849 | 56     | -10.233  | 0.855032 | -2.21694     | 1.961064       |
| 57    | -3.02675 | 0.601186 | 57     | -4.56618 | 0.955584 | 1.539426     | 1.128966       |
| 58    | -2.31104 | 1.107667 | 58     | -14.958  | 1.563706 | 12.64694     | 1.916273       |
| 60    | -6.25068 | 0.562976 | 60     | -10.3457 | 0.609416 | 4.095031     | 0.829657       |
| 61    | -3.65611 | 0.603265 | 61     | -6.55136 | 0.301814 | 2.895256     | 0.674552       |
| 62    | -3.40231 | 1.239078 | 62     | -3.56765 | 1.858483 | 0.165336     | 2.233668       |
| 63    | -2.44051 | 0.39847  | 63     | -6.28876 | 0.963329 | 3.84825      | 1.042488       |
| 64    | -3.30897 | 2.11171  | 64     | -8.7494  | 1.785947 | 5.440431     | 2.76567        |
| 65    | -2.57741 | 3.562939 | 65     | -5.77269 | 0.650307 | 3.19528      | 3.6218         |
| 66    | -8.28902 | 2.902417 | 66     | -4.21594 | 1.069198 | -4.07308     | 3.09309        |
| 67    | -6.27564 | 0.837893 | 67     | -7.56282 | 1.011062 | 1.287179     | 1.313131       |
| 68    | -0.50074 | 2.503956 | 68     | -8.25356 | 0.473855 | 7.752822     | 2.548399       |
| 69    | -3.57233 | 1.028406 | 69     | -4.56633 | 1.364208 | 0.993996     | 1.708415       |
| 71    | -5.27621 | 0.695455 | 71     | -9.77836 | 0.397686 | 4.502145     | 0.801132       |
| 72    | -2.63291 | 4.208909 | 72     | 1.17532  | 0.9256   | -3.80823     | 4.309484       |
| 76    | -2.15295 | 1.289336 | 76     | -7.91534 | 1.237288 | 5.762389     | 1.786972       |

|     |          |          |     |          |          |          |          |
|-----|----------|----------|-----|----------|----------|----------|----------|
| 77  | -0.54694 | 1.630773 | 77  | 0.722232 | 1.548615 | -1.26917 | 2.248917 |
| 78  | -1.24999 | 1.181898 | 78  | -1.06167 | 1.020151 | -0.18832 | 1.561279 |
| 80  | -3.39564 | 1.122623 | 80  | -5.90794 | 1.966983 | 2.512307 | 2.264797 |
| 81  | 2.154125 | 1.150178 | 81  | 4.480214 | 2.277488 | -2.32609 | 2.551443 |
| 83  | -1.36894 | 1.189538 | 83  | -5.43006 | 2.856647 | 4.061112 | 3.09442  |
| 84  | -3.16337 | 1.408634 | 84  | -6.52961 | 0.704916 | 3.366233 | 1.575168 |
| 85  | 0.829522 | 0.843101 | 85  | 1.613346 | 1.30536  | -0.78382 | 1.553957 |
| 86  | -1.8958  | 0.728788 | 86  | -1.61    | 0.650911 | -0.28581 | 0.977147 |
| 88  | -3.911   | 0.721962 | 88  | -4.52768 | 1.444976 | 0.61668  | 1.615297 |
| 89  | 3.438684 | 0.90158  | 89  | 4.842775 | 0.492349 | -1.40409 | 1.027256 |
| 90  | -2.38103 | 1.27184  | 90  | -4.89861 | 1.555946 | 2.517582 | 2.009614 |
| 91  | -12.0851 | 0.399388 | 91  | -12.5279 | 0.817818 | 0.442807 | 0.91013  |
| 92  | -4.95759 | 1.518606 | 92  | -0.28116 | 2.108543 | -4.67643 | 2.598484 |
| 93  | -3.22347 | 0.554462 | 93  | -3.61405 | 0.570734 | 0.39058  | 0.795717 |
| 94  | -3.97184 | 0.258556 | 94  | -3.59306 | 5.462112 | -0.37879 | 5.468228 |
| 95  | 1.103178 | 1.410363 | 95  | -4.79744 | 0.973521 | 5.900614 | 1.713729 |
| 96  | 0.034833 | 3.50119  | 96  | -4.68361 | 1.171956 | 4.718439 | 3.692128 |
| 97  | -5.18218 | 0.789589 | 97  | -5.86945 | 0.068374 | 0.687269 | 0.792544 |
| 98  | -2.98443 | 0.35776  | 98  | -4.0323  | 0.77165  | 1.04787  | 0.85055  |
| 99  | -3.08333 | 0.927677 | 99  | -6.89536 | 0.690337 | 3.812034 | 1.156352 |
| 100 | -6.14553 | 1.591145 | 100 | -4.52616 | 1.076837 | -1.61937 | 1.921281 |
| 101 | -7.7208  | 0.833909 | 101 | -8.32553 | 0.62511  | 0.604727 | 1.042193 |
| 102 | -0.72008 | 1.253782 | 102 | -1.44355 | 0.404509 | 0.723475 | 1.317421 |
| 103 | 5.069381 | 1.428545 | 103 | -4.94973 | 0.735823 | 10.01911 | 1.606915 |
| 104 | -5.17079 | 0.784464 | 104 | -7.00065 | 0.404938 | 1.829863 | 0.882813 |
| 105 | -7.41113 | 2.200693 | 105 | -4.82406 | 0.450741 | -2.58707 | 2.246379 |
| 106 | 2.2195   | 0.382034 | 106 | -1.76153 | 0.929566 | 3.981035 | 1.005009 |
| 108 | 1.101512 | 2.172275 | 108 | -9.19397 | 0.781145 | 10.29548 | 2.308455 |
| 110 | -15.6611 | 1.043727 | 110 | -14.6549 | 1.586668 | -1.00623 | 1.899179 |
| 112 | -0.51344 | 0.498329 | 112 | 0.245562 | 1.527971 | -0.75901 | 1.607179 |
| 113 | -5.16014 | 1.201291 | 113 | -7.38938 | 2.053296 | 2.229233 | 2.378891 |
| 114 | -7.90279 | 0.463832 | 114 | -6.93294 | 0.650915 | -0.96985 | 0.799269 |
| 115 | 4.793329 | 3.042462 | 115 | 1.446443 | 2.101695 | 3.346887 | 3.697796 |
| 116 | -0.17343 | 1.156065 | 116 | 1.890554 | 2.351499 | -2.06398 | 2.620311 |
| 117 | -4.66229 | 0.795135 | 117 | -5.92392 | 0.635882 | 1.261627 | 1.018128 |
| 118 | -8.06972 | 1.457864 | 118 | -7.84733 | 0.448496 | -0.22238 | 1.525292 |
| 120 | -1.09119 | 1.120302 | 120 | -4.59721 | 0.273077 | 3.506021 | 1.153103 |
| 121 | -8.70873 | 1.348314 | 121 | -7.99385 | 1.522983 | -0.71487 | 2.034067 |
| 122 | -0.12624 | 1.203558 | 122 | 0.044731 | 1.044636 | -0.17097 | 1.59368  |
| 123 | 3.586862 | 5.000746 | 123 | 4.6885   | 0.478755 | -1.10164 | 5.023611 |
| 124 | -7.10305 | 0.876055 | 124 | -4.99279 | 0.624498 | -2.11026 | 1.075858 |
| 125 | -7.39253 | 0.712506 | 125 | -3.95455 | 1.83718  | -3.43797 | 1.970507 |
